# Supplementary material
Source: PubMed Central journal article supplement (PMC7240804)
Supplement: NIHMS1562734-supplement-Appendix2.pdf [file NIHMS1562734-supplement-Appendix2.pdf]

## APPENDIX 2: Functional Status Metrics Survey Questions

### Current Feeding Tube Status

1) Do you currently have a **feeding tube**?

- Yes
- No

### Normalcy of Diet

2) What **kinds of foods** you are able to eat? (Mark one)

*Please mark the item that represents the highest level of foods or liquids you eat. If you have a feeding tube, but also eat by mouth, please mark the highest level of foods you eat in addition to your tube feedings.*

7. I eat **whatever I would like** (full diet no restriction).

6. I eat **whatever I would like, but require more liquids than usual with meals** (full diet with liquid assist).

5. I eat **solid food but avoid some hard to eat foods** (like meats, raw vegetables/ fruits).

4. I eat **soft chewable foods** (like pasta, cooked vegetables, fish, dry foods).

3. I eat **non-chewable or pureed foods**.

2. I drink **warm and cold liquids**.

1. I **do not eat or drink anything by mouth**; I only use a feeding tube.

### Public Eating

3) Select the statement that best reflects if and how you **eat in public**:

- I eat out at **any opportunity with no restriction of place, food, or companion**.
- I eat out with **no restriction of place, but I restrict my diet when in public**.
- I eat only in the presence of **selected person in selected places**.
- I only eat **at home with selected persons**.
- I always eat **alone**.

### Understandability of Speech

4) How well are you understood when **speaking to other people**?

- My speech is **always understandable**.
- My speech is **understandable most of the time**, I am occasionally asked to repeat myself.
- My speech is **usually understandable**, but face-to-face contact is necessary.
- My speech is **difficult to understand**.
- My speech is **never understandable**.

**Aspiration Pneumonia**

5) Since your cancer treatment, has a **doctor or other health professional told you** that you have:

|            | Yes                   | No                    | Don't Know            |
|------------|-----------------------|-----------------------|-----------------------|
| Pneumonia? | <input type="radio"/> | <input type="radio"/> | <input type="radio"/> |

**Tracheostomy**

6) Do you currently have a **tracheostomy tube (or breathing tube)**?

- Yes
- No

7) Since your cancer treatment, has a **doctor or other health professional told you** that you have:

|                                                                                                                                                          | Yes                   | No                    | Don't Know            |
|----------------------------------------------------------------------------------------------------------------------------------------------------------|-----------------------|-----------------------|-----------------------|
| <b>Stricture of the throat or esophagus?</b><br>(Stricture is a narrowing or tightness of the food tube that may cause sticking or obstruction of food.) | <input type="radio"/> | <input type="radio"/> | <input type="radio"/> |

But we did not use this variable we abstracted EGD/Dilation Variable from the Charts.

**Current Height and Weight**

8) What are your current **height** and **weight**?

- a) Height: \_\_\_\_\_ ft. \_\_\_\_\_ in.
- b) Weight: \_\_\_\_\_ lbs.
